# Supplementary material
Source: PubMed Central journal article supplement (PMC3989837)
Supplement: NIHMS566631-supplement-01.pdf [file NIHMS566631-supplement-01.pdf]

## Experimental details

### General

The solvents used are of ACS grade or HPLC grade. The ligand mbc94 was synthesized using the previously reported procedure.<sup>33</sup> The NIR dye, IR700DX-NHS ester, was purchased from LI-COR Bioscience (product number 929-70011). Flash column chromatography was performed using the TELEDYNE ISCO (combiflash RF) purification system with silica gel (standard grade, 60A, Sorbtech). <sup>1</sup>H NMR spectra were recorded on the Bruker Avance III 400 MHz. Mass spectra were recorded on a Waters LCT Premier mass spectrometer. UV/Vis spectra were recorded on a Cary 100 Bio UV-Vis spectrophotometer, and fluorescence spectra were recorded on a Cary Eclipse fluorescence spectrophotometer.

### Characterization of IR700DX-mbc94

<sup>1</sup>H NMR (400 MHz, *d*<sub>4</sub>-MeOD, 25 °C, TMS): δ = 9.74-9.77 (m, 5 H), 9.61-9.63 (m, 1 H), 9.43 (d, *J* = 7.2 Hz, 1 H), 8.55 (s, 1 H), 8.48-8.50 (m, 5 H), 8.45 (d, *J* = 8 Hz, 1 H), 8.06 (s, *J* = 8 Hz, 1 H), 7.39 (d, *J* = 8 Hz, 2 H), 7.30-7.34 (m, 2 H), 7.19 (dd, *J* = 8 & 1.6 Hz, 1 H), 7.05 (d, *J* = 8 Hz, 2 H), 6.86 (s, 1 H), 5.48 (s, 2 H), 4.60 (br.s, 12 H), 4.00 (s, 1 H), 3.77 (d, *J* = 2 Hz, 1 H), 3.13-3.17 (m, 4 H), 2.73-2.79 (m, 26 H), 2.34 (s, 3 H), 2.19 (t, *J* = 7.2 Hz, 2 H), 2.00-2.04 (m, 2H), 1.69-1.80 (m, 14 H), 1.49-1.65 (m, 9 H), 1.29-1.39 (m, 6 H), 1.15 (s, 3 H), 1.08 (s, 3 H), 0.86 (s, 3 H), -0.96 (br.s, 4 H), -2.11- -2.09 (m, 4 H), -2.77 (s, 12 H). MS (ESI): calcd. for C<sub>105</sub>H<sub>143</sub>ClN<sub>16</sub>O<sub>25</sub>S<sub>6</sub>Si<sub>3</sub> *m/z* 2339.78, found *m/z* 2339.95.

### Cell Culture

In vitro studies were performed using a mouse malignant astrocytoma cell line transfected with CB<sub>2</sub>R, CB<sub>2</sub>-mid DBT (delay brain tumor), which expresses CB<sub>2</sub>R at endogenous levels, as well as a wild type (WT) DBT cell line without CB<sub>2</sub>R expression. CB<sub>2</sub>-mid DBT and WT-DBT cells were cultured in DMEM containing 10% fetal bovine serum, 4 mM glutamine, 100 units/mL penicillin and 100 μg/mL streptomycin. The human CB<sub>2</sub>-expressing CHO-K1/CB2 cells were cultured according to the previously published literature (Gertsch, et al., 2008).

### In Vivo Phototherapy

The animal experiments are in accordance with the guidelines for the Care and Use of Laboratory Animals of the Medical Research Council of University of Pittsburgh. CB<sub>2</sub>-mid DBT cells (1 × 10<sup>6</sup>) were subcutaneously implanted into the right flank of 4–5 week old female nu/nu mice. Mice with tumor volume reaching approximately 40-50 mm<sup>3</sup> were selected for study. Selected mice were randomized into non-treatment and phototherapy treatment groups (n=3 for each group). For phototherapy treatment, tumor bearing mice were intravenously injected with 10 nmole IR700DX-mbc94 via tail vein. After 6 h post-injection at which IR700DX-mbc94 reached a peak tumor accumulation (data not shown), mice were anesthetized with 2.5% isoflurane and tumor area was irradiated under NIR light (90 J/cm<sup>2</sup>) using the same light source as in vitro phototherapy study. In vivo phototherapy study was conducted every 5 days. The tumor volume was measured daily using a caliper and tumor volume was calculated by length × width<sup>2</sup>/2. Photographic images were captured by a charge-coupled device camera-based bioluminescence imaging system (IVIS Lumina XR). When tumor diameters reached 15 mm, mice were euthanized with carbon dioxide gas.

## **Data Processing and Statistics**

All of the data are given as the mean  $\pm$  standard deviation (SD) of  $n$  independent measurements. Statistical analysis was performed using a two-tailed unpaired Student's  $t$  test (IBM SPSS Statistics version 21), with  $p$  values  $<0.05$  considered statistically significant.

(a)

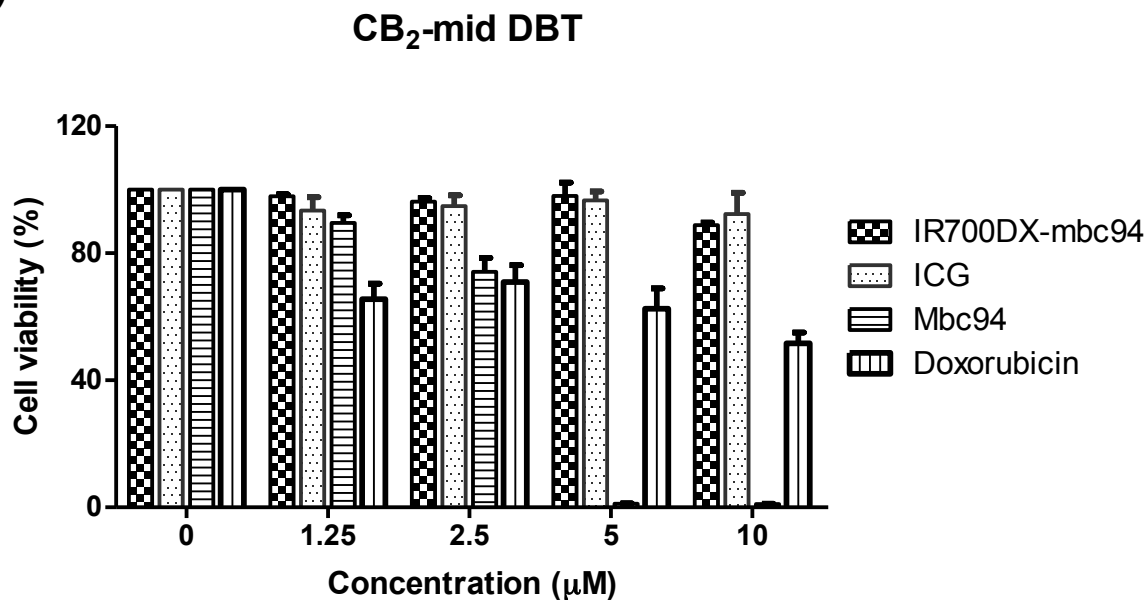

(b)

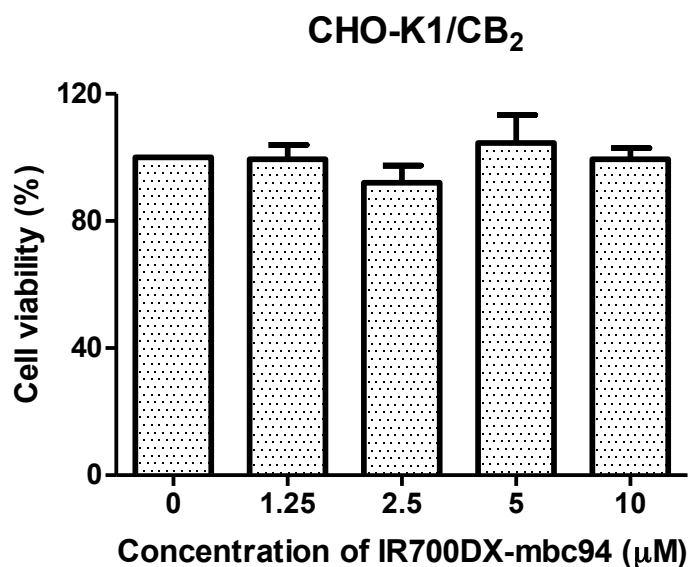

**Figure S1. Cytotoxicity of IR700DX-mbc94 (relevant to Experimental Procedures).**

(a) To evaluate the cytotoxicity of IR700DX-mbc94 without NIR light irradiation, CB<sub>2</sub>-mid DBT cells were incubated with 0, 1.25, 2.5, 5, 10  $\mu\text{M}$  of IR700DX-mbc94 or Mbc94 alone for 24 h. ICG with the same concentration of IR700DX-mbc94 was used as the negative control. Doxorubicin was used as the positive control. (b) To test the toxicity of the IR700DX-mbc94 in cells that express the CB<sub>2</sub> receptor but are not tumoral, CHO-K1/CB<sub>2</sub> cells were treated with indicated concentration of IR700DX-mbc94 (0, 1.25, 2.5, 5, 10  $\mu\text{M}$ ) for 24 h. Cell viability was measured using the CellTiter-Glo Luminescent Cell Viability assay. Each data point represents the mean  $\pm$  SD based on triplicate samples.

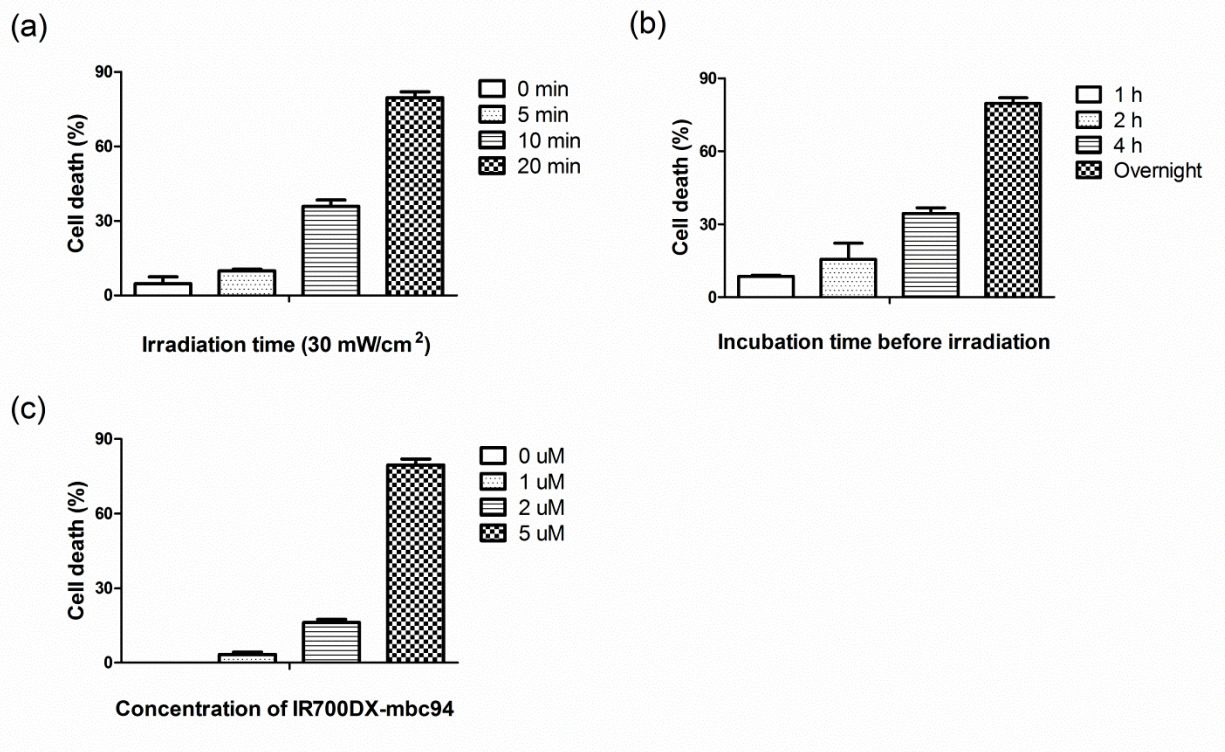

**Figure S2. Effect of light irradiation dose, incubation time and concentration of IR700DX-mbc94 on phototherapy (relevant to Figure 3).**

CB<sub>2</sub>-mid DBT cells were treated with (a) 5  $\mu$ M of IR700DX-mbc94 with 30 mW/cm<sup>2</sup> NIR light exposure for 0 min, 5 min, 10 min, and 20 min; (b) 5  $\mu$ M of IR700DX-mbc94 with an incubation time of 1 h, 2 h, 4 h or overnight before NIR light irradiation (30 mW/cm<sup>2</sup>, 20 min); (c) 0, 1, 2, or 5  $\mu$ M of IR700DX-mbc94 overnight, and irradiated with NIR light (30 mW/cm<sup>2</sup>, 20 min). Each data point represents the mean  $\pm$  SD based on triplicate samples.

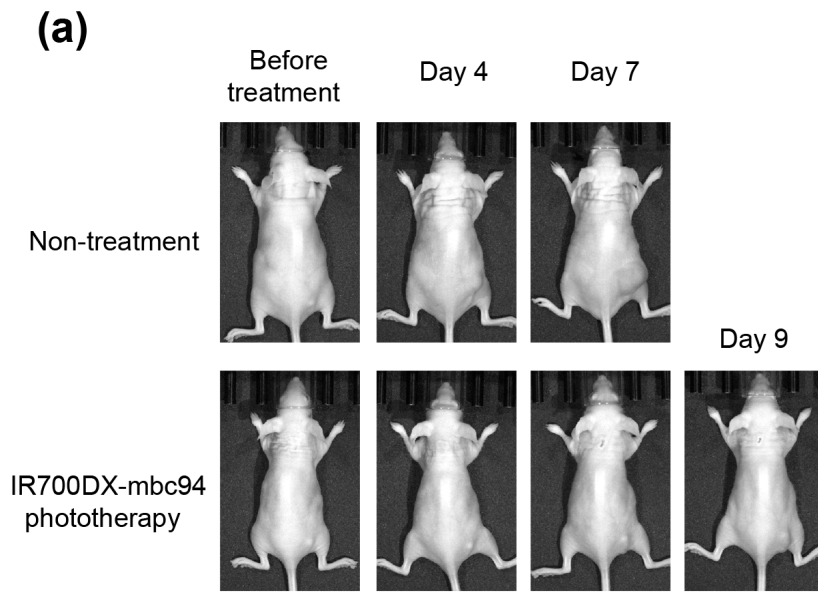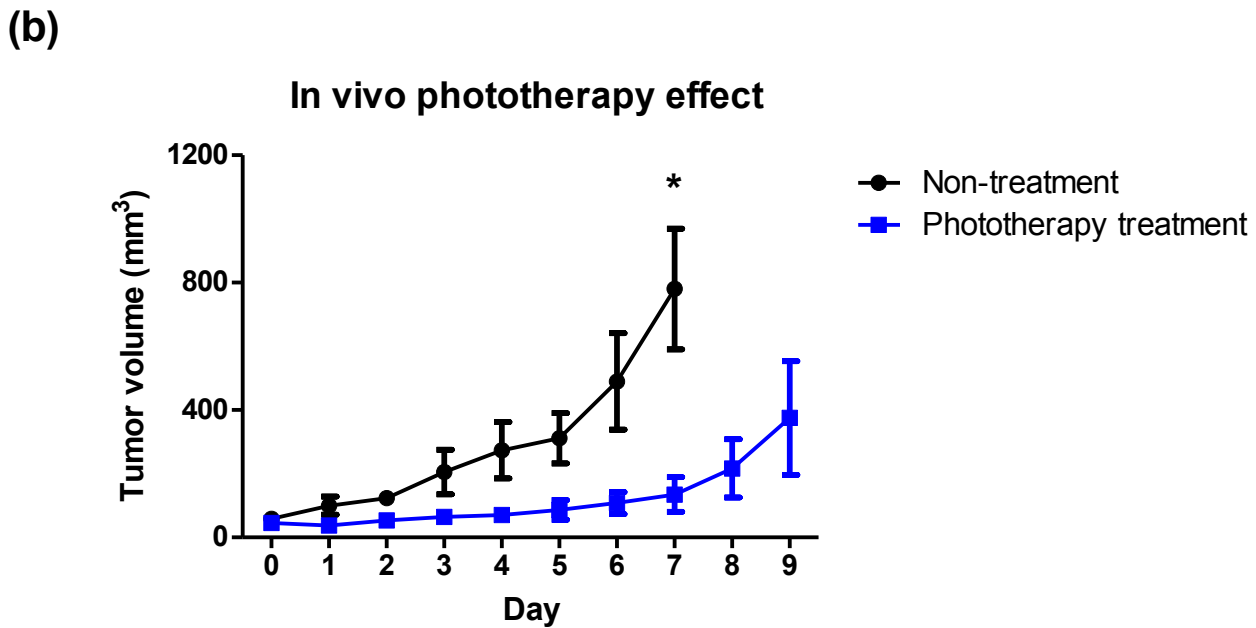

**Figure S3. In vivo phototherapy study (relevant to Figure 3).**

CB<sub>2</sub>-mid DBT subcutaneous tumor bearing mice were intravenously injected with 10 nmole IR700DX-abc94 via tail vein. After 6 h post-injection mice were anesthetized with 2.5% isoflurane and tumor area was irradiated under NIR light (90 J/cm<sup>2</sup>). In vivo phototherapy was conducted at day 0 and day 5. The tumor volume was measured daily. (a) Photographic images were captured by a charge-coupled device camera-based bioluminescence imaging system. (b) Quantitative comparison of tumor growth between phototherapy treatment and non-treatment group. Each data point represents the mean ± SD based on three animals (\* *p* < 0.05).

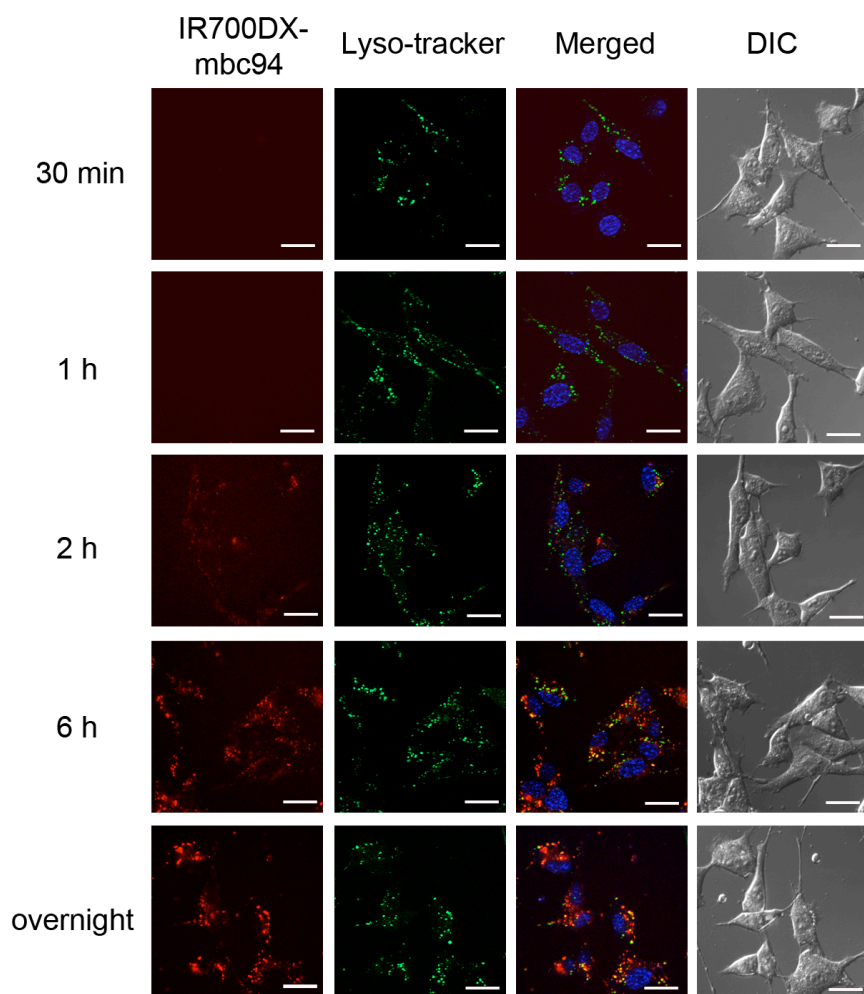

**Figure S4. Localization of IR700DX-mbc94 in CB<sub>2</sub>-mid DBT cells (relevant to Figure 4 and Experimental Procedures).**

CB<sub>2</sub>-mid DBT cells were treated with 5  $\mu$ M of IR700DX-mbc94 at 37 °C for 30 min, 1 h, 2 h, 6 h and overnight. Co-localization of IR700DX-mbc94 with lysosome (LysoTracker) and nuclear (DAPI) was imaged under Zeiss Axio Observer fluorescent microscopy. Certain co-localization (orange color) of LysoTracker and IR700DX-mbc94 fluorescence after 2 h of incubation was observed, indicating that part of IR700DX-mbc94 bound to surface CB<sub>2</sub>R and internalized afterwards. The majority of IR700DX-mbc94 molecules bound to intracellularly expressed CB<sub>2</sub>R.

## **Reference**

Gertsch, J., Leonti, M., Raduner, S., Racz, I., Chen, J.Z., Xie, X.Q., Altmann, K.H., Karsak, M., and Zimmer, A. (2008). Beta-caryophyllene is a dietary cannabinoid. *Proc Natl Acad Sci U S A* 105, 9099-9104.
